# Supplementary material
Source: PubMed Central journal article supplement (PMC4201000)
Supplement: supp_the2014-0228_Johnson-14-228.pdf [file supp_the2014-0228_Johnson-14-228.pdf]

## Overview

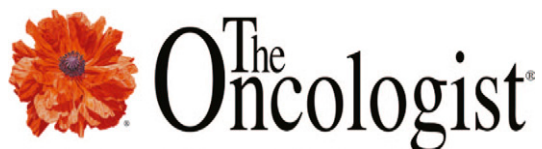

The official journal of the Society for Translational Oncology

**First Published Online August 28, 2014**

**DOI:** 10.1634/theoncologist.2014-0228

**Title:** A Phase I/II Study Combining Erlotinib and Dasatinib for Non-Small Cell Lung Cancer

**Authors:** Kathryn A. Gold,<sup>a</sup> J. Jack Lee,<sup>a</sup> Nusrat Harun,<sup>b</sup> Ximing Tang,<sup>a</sup> Justina Price,<sup>a</sup> Jitesh D. Kawedia,<sup>a</sup> Hai T. Tran,<sup>a</sup> Jeremy J. Erasmus,<sup>a</sup> George R. Blumenschein,<sup>a</sup> William N. William,<sup>a</sup> Ignacio I. Wistuba,<sup>a</sup> Faye M. Johnson<sup>a</sup>

<sup>a</sup>University of Texas MD Anderson Cancer Center, Houston, Texas, USA; <sup>b</sup>Cincinnati Children's Hospital Medical Center, Cincinnati, Ohio, USA

**ClinicalTrials.gov Identifier:** NCT00826449

**Sponsor(s):** Bristol-Myers Squibb and Astellas Pharmaceuticals

**Principal Investigator:** Faye M. Johnson

**IRB Approved:** Yes

### Disclosures

**Ignacio I. Wistuba:** Pfizer, Bayer, Eli Lilly, Genentech/Roche, GlaxoSmithKline, GeneCentric (C/A); Pfizer, Boehringer Ingelheim (H); Genentech, Bayer, Merck, Oncoplex, Myriad (RF); **George R. Blumenschein:** Bristol-Myers Squibb (C/A, RF); **Faye M. Johnson:** Bristol-Myers Squibb, Novartis (C/A). The other authors indicated no financial relationships.

(C/A) Consulting/advisory relationship; (RF) Research funding; (E) Employment; (ET) Expert testimony; (H) Honoraria received; (OI) Ownership interests; (IP) Intellectual property rights/inventor/patent holder; (SAB) Scientific advisory board

## Author Summary: Abstract and Brief Discussion

### Background

EGFR and Src are frequently activated in non-small cell lung cancer (NSCLC). In preclinical models, combining EGFR and Src inhibition has additive synergistic effects. We conducted a phase I/II trial of the combination of Src inhibitor dasatinib with EGFR inhibitor erlotinib to determine the maximum tolerated dose (MTD), pharmacokinetic drug interactions, biomarkers, and efficacy in NSCLC.

### Methods

The phase I 3+3 dose-escalation study enrolled patients with solid tumors to determine the MTD. The phase II trial enrolled patients with advanced NSCLC who had undergone no previous treatments to determine progression-free survival (PFS) and response. Pharmacokinetic and tissue biomarker analyses were performed.

### Results

MTD was 150 mg of erlotinib and 70 mg of dasatinib daily based on 12 patients treated in the phase I portion. No responses were observed in phase I. The 35 NSCLC patients treated in phase II had an overall disease control rate of 59% at 6 weeks. Five patients (15%) had partial responses; all had activating *EGFR* mutations. Median PFS was 3.3 months. Epithelial-mesenchymal transition markers did not correlate with outcomes.

### Conclusion

The combination of erlotinib and dasatinib is safe and feasible in NSCLC. The results of this study do not support use of this combination in molecularly unselected NSCLC.

## Discussion

One strategy to enhance the efficacy of EGFR inhibitors in NSCLC is to combine them with Src inhibitors. This combination has additive effects in NSCLC cell lines in vitro, with synergistic effects observed in *EGFR* mutant cells [1–4]. In addition, NSCLC with an epithelial phenotype may be more sensitive to EGFR inhibition, and the addition of Src inhibition may overcome EGFR inhibitor resistance in mesenchymal tumors [5–10]. These findings led to the initiation of this study combining erlotinib with the Src inhibitor dasatinib [11–13] in NSCLC patients to evaluate the clinical activity of this combination and to test predictive biomarkers and pharmacokinetic interactions.

We performed a phase I/II study of this combination. The phase I portion enrolled patients with advanced solid tumors with any number of previous therapies. The phase II portion included stage IV NSCLC. The primary objective of the phase I portion was to assess the safety and tolerability of the combination and to determine the appropriate dose for phase II. The primary objective of the phase II portion was to determine the antitumor activity of the combination in NSCLC patients. Tumor size was assessed by computed tomography at baseline and every 6 weeks. We used existing tissue to assess E-cadherin and vimentin expression by immunohistochemistry [14] and to detect mutations in *EGFR* and *KRAS* by polymerase chain reaction, as described previously [14–16]. Erlotinib and dasatinib are both metabolized primarily by CYP3A4 [17–19]. Treatment with a CYP3A4 inhibitor or inducer increases or decreases exposure to both drugs, respectively [17, 18]. Dasatinib and erlotinib plasma concentrations were estimated, as described previously [20–22].

Based on 12 patients in phase I and in a similar study [23], we chose 150 mg of erlotinib and 70 mg of dasatinib daily for the phase II study. Toxic effects were consistent with those observed in previous studies with these agents. Five (15%) of 33 evaluable patients enrolled in the phase II study had partial responses, and no patients had complete responses. Fifteen patients (44%) had stable disease (Fig. 1). All responders had activating *EGFR* mutations; *EGFR* mutation status was associated with overall response rate (62% in mutant *EGFR* and 0% in wild-type *EGFR*,  $p = .005$ ). Our pharmacokinetic results corroborate previous studies showing erlotinib-mediated inhibition of dasatinib clearance [24]. E-cadherin and vimentin expression did not correlate with efficacy. Our results do not support continued study of the combination of erlotinib and dasatinib in molecularly unselected NSCLC.

## Trial Information

|                                                        |                                                                                                                                                                                                                                                                                                                                                                                                                                                                                                                                                                                                                                                                                                                                                                                                                                          |
|--------------------------------------------------------|------------------------------------------------------------------------------------------------------------------------------------------------------------------------------------------------------------------------------------------------------------------------------------------------------------------------------------------------------------------------------------------------------------------------------------------------------------------------------------------------------------------------------------------------------------------------------------------------------------------------------------------------------------------------------------------------------------------------------------------------------------------------------------------------------------------------------------------|
| <b>Disease</b>                                         | Lung cancer – NSCLC                                                                                                                                                                                                                                                                                                                                                                                                                                                                                                                                                                                                                                                                                                                                                                                                                      |
| <b>Stage of disease / treatment</b>                    | Metastatic / Advanced                                                                                                                                                                                                                                                                                                                                                                                                                                                                                                                                                                                                                                                                                                                                                                                                                    |
| <b>Prior Therapy</b>                                   | One prior regimen                                                                                                                                                                                                                                                                                                                                                                                                                                                                                                                                                                                                                                                                                                                                                                                                                        |
| <b>Type of study - 1</b>                               | Phase II                                                                                                                                                                                                                                                                                                                                                                                                                                                                                                                                                                                                                                                                                                                                                                                                                                 |
| <b>Type of study - 2</b>                               | Single Arm                                                                                                                                                                                                                                                                                                                                                                                                                                                                                                                                                                                                                                                                                                                                                                                                                               |
| <b>Primary Endpoint</b>                                | Progression-Free Survival                                                                                                                                                                                                                                                                                                                                                                                                                                                                                                                                                                                                                                                                                                                                                                                                                |
| <b>Secondary Endpoint</b>                              | Overall Response Rate                                                                                                                                                                                                                                                                                                                                                                                                                                                                                                                                                                                                                                                                                                                                                                                                                    |
| <b>Secondary Endpoint</b>                              | Overall Survival                                                                                                                                                                                                                                                                                                                                                                                                                                                                                                                                                                                                                                                                                                                                                                                                                         |
| <b>Secondary Endpoint</b>                              | Correlative Endpoint                                                                                                                                                                                                                                                                                                                                                                                                                                                                                                                                                                                                                                                                                                                                                                                                                     |
| <b>Additional Details of Endpoints or Study Design</b> | The primary objective of the phase I portion of the study was to assess the safety and tolerability of the combination of dasatinib and erlotinib in patients with solid tumors to determine the appropriate dose for phase II. The primary objective of the phase II portion was to determine the antitumor activity of the combination of dasatinib and erlotinib in patients with NSCLC on the basis of the progression-free survival (PFS). The secondary objectives of phase II were to determine the response rate and overall survival (OS); to investigate the associations between clinical response and <i>EGFR</i> mutational status, <i>KRAS</i> mutational status, and expressions of E-cadherin, and vimentin in pretreatment tumor biopsies; and to determine the pharmacokinetic parameters for dasatinib and erlotinib. |
| <b>Investigator's Analysis</b>                         | Active but results overtaken by other developments                                                                                                                                                                                                                                                                                                                                                                                                                                                                                                                                                                                                                                                                                                                                                                                       |

## Drug Information

### Drug 1

|                            |                          |
|----------------------------|--------------------------|
| Generic/Working name       | Dasatinib                |
| Trade name                 | Sprycel                  |
| Company name               | Bristol-Myers Squibb     |
| Drug type                  | Small molecule           |
| Drug class                 | SRC                      |
| Dose                       | 70 mg (mg) per flat dose |
| Route                      | Oral (po)                |
| Schedule of Administration | Daily                    |

### Drug 2

|                            |                           |
|----------------------------|---------------------------|
| Generic/Working name       | Erlotinib                 |
| Trade name                 | Tarceva                   |
| Company name               | Astellas                  |
| Drug type                  | Small molecule            |
| Drug class                 | EGFR                      |
| Dose                       | 150 mg (mg) per flat dose |
| Route                      | Oral (po)                 |
| Schedule of Administration | Daily                     |

## Patient Characteristics

|                                     |                                                                                                                                  |
|-------------------------------------|----------------------------------------------------------------------------------------------------------------------------------|
| Number of patients, male            | 26                                                                                                                               |
| Number of patients, female          | 21                                                                                                                               |
| Stage                               | IV                                                                                                                               |
| Age                                 | Median (range): 62                                                                                                               |
| Number of prior systemic therapies  | Median (range): 0 (0-4)                                                                                                          |
| Performance Status:                 | ECOG<br>0 — 10<br>1 — 37<br>2 — 0<br>3 — 0<br>unknown — 0                                                                        |
| Cancer Types or Histologic Subtypes | NSCLC (Squamous) 11<br>NSCLC (Adenocarcinoma) 25<br>NSCLC 5<br>Mesothelioma 2<br>SCLC 1<br>HNSCC 2<br>Adenoid Cystic Carcinoma 1 |

## Primary Assessment Method

### Experimental Arm: Total Patient Population

|                                           |       |
|-------------------------------------------|-------|
| Number of patients screened               | 53    |
| Number of patients enrolled               | 47    |
| Number of patients evaluable for toxicity | 46    |
| Number of patients evaluated for efficacy | 33    |
| Evaluation method                         | Other |
| Response assessment CR                    | 0%    |
| Response assessment PR                    | 5%    |

|                                                            |                      |
|------------------------------------------------------------|----------------------|
| <b>Response assessment SD</b>                              | 15%                  |
| <b>Response assessment PD</b>                              | 13%                  |
| <b>Response assessment other</b>                           | 2%                   |
| <b>(Median) duration assessments PFS</b>                   | 3.3 months, CI: 2.04 |
| <b>(Median) duration assessments TTP</b>                   | months               |
| <b>(Median) duration assessments OS</b>                    | 13 months, CI: 6.41  |
| <b>(Median) duration assessments response duration</b>     | 140 days             |
| <b>(Median) duration assessments duration of treatment</b> | 49 days              |

## Adverse Events

| <b>Name</b>                                           | <b>NC/NA</b> | <b>1</b> | <b>2</b> | <b>3</b> | <b>4</b> | <b>5</b> | <b>All Grades</b> |
|-------------------------------------------------------|--------------|----------|----------|----------|----------|----------|-------------------|
| Diarrhea                                              | 36%          | 54%      | 8%       | 0%       | 0%       | 0%       | 63%               |
| Rash: acne/acneiform                                  | 43%          | 30%      | 23%      | 2%       | 0%       | 0%       | 56%               |
| Dyspnea (shortness of breath)                         | 58%          | 2%       | 21%      | 17%      | 0%       | 0%       | 41%               |
| Pruritus/itching                                      | 93%          | 4%       | 2%       | 0%       | 0%       | 0%       | 6%                |
| ALT, SGPT (serum glutamic pyruvic transaminase)       | 89%          | 10%      | 0%       | 0%       | 0%       | 0%       | 10%               |
| Hair loss/alopecia (scalp or body)                    | 95%          | 4%       | 0%       | 0%       | 0%       | 0%       | 4%                |
| Anorexia                                              | 76%          | 15%      | 8%       | 0%       | 0%       | 0%       | 23%               |
| AST, SGOT(serum glutamic oxaloacetic transaminase)    | 78%          | 19%      | 2%       | 0%       | 0%       | 0%       | 21%               |
| Bilirubin (hyperbilirubinemia)                        | 91%          | 4%       | 4%       | 0%       | 0%       | 0%       | 8%                |
| Creatinine                                            | 89%          | 8%       | 2%       | 0%       | 0%       | 0%       | 10%               |
| Fatigue (asthenia, lethargy, malaise)                 | 45%          | 15%      | 28%      | 10%      | 0%       | 0%       | 54%               |
| Edema: limb                                           | 91%          | 8%       | 0%       | 0%       | 0%       | 0%       | 8%                |
| Hemoglobin                                            | 50%          | 28%      | 21%      | 0%       | 0%       | 0%       | 50%               |
| Hemorrhage, pulmonary/upper respiratory               | 97%          | 2%       | 0%       | 0%       | 0%       | 0%       | 2%                |
| Calcium, serum-low (hypocalcemia)                     | 80%          | 15%      | 4%       | 0%       | 0%       | 0%       | 19%               |
| Sodium, serum-low (hyponatremia)                      | 84%          | 8%       | 0%       | 4%       | 2%       | 0%       | 15%               |
| Phosphate, serum-low (hypophosphatemia)               | 78%          | 8%       | 0%       | 13%      | 0%       | 0%       | 21%               |
| Hypoxia                                               | 91%          | 0%       | 4%       | 2%       | 0%       | 2%       | 8%                |
| Pleural effusion (nonmalignant)                       | 69%          | 10%      | 13%      | 6%       | 0%       | 0%       | 30%               |
| Infection with normal ANC or Grade 1 or 2 neutrophils | 91%          | 0%       | 4%       | 4%       | 0%       | 0%       | 8%                |
| Mucositis/stomatitis (clinical exam)                  | 89%          | 6%       | 2%       | 2%       | 0%       | 0%       | 10%               |
| Nausea                                                | 50%          | 39%      | 6%       | 4%       | 0%       | 0%       | 50%               |
| Neutrophils/granulocytes (ANC/AGC)                    | 97%          | 0%       | 0%       | 2%       | 0%       | 0%       | 2%                |
| Pain                                                  | 67%          | 19%      | 6%       | 6%       | 0%       | 0%       | 32%               |
| Pericardial effusion (nonmalignant)                   | 97%          | 0%       | 0%       | 2%       | 0%       | 0%       | 2%                |
| Platelets                                             | 82%          | 13%      | 2%       | 2%       | 0%       | 0%       | 17%               |
| Thrombosis/thrombus/embolism                          | 93%          | 0%       | 4%       | 0%       | 2%       | 0%       | 6%                |
| Vomiting                                              | 82%          | 13%      | 2%       | 2%       | 0%       | 0%       | 17%               |

These data represent all cycles' toxicities.

Abbreviation: NC/NA, no change from baseline/no adverse event.

## Serious Adverse Events

| <b>Name</b>           | <b>Grade</b> | <b>Attribution</b> |
|-----------------------|--------------|--------------------|
| Myocardial infarction | 5            | Unrelated          |

## Assessment, Analysis, and Discussion

|                                     |                                                    |
|-------------------------------------|----------------------------------------------------|
| Completion                          | Study completed                                    |
| Pharmacokinetics / Pharmacodynamics | Correlative Endpoints Met                          |
| Investigator's Assessment           | Active but results overtaken by other developments |

### Discussion

NSCLC continues to pose a formidable challenge in clinical practice. Erlotinib is most effective in *EGFR*-mutant NSCLC [25] but also has activity in wild-type *EGFR* disease [26]. *EGFR* and Src are both overexpressed in NSCLC, and this overexpression is associated with disease progression [27]. The combination of Src inhibitors and *EGFR* inhibitors has at least additive cytotoxic effects in NSCLC cell lines in vitro, with synergistic effects observed in cell lines with *EGFR* mutations [1, 2]. These encouraging preclinical findings led to the initiation the current study, which demonstrates that the combination of erlotinib and dasatinib is safe and feasible in advanced NSCLC. The maximum tolerated dose was 150 mg of erlotinib and 70 mg of dasatinib daily. The dose-limiting toxicities were hypophosphatemia, fatigue, and hyponatremia. The most commonly observed toxic effects were acne and diarrhea, which were usually low grade and could be managed effectively with supportive medications. Fatigue was also very common. As with other tyrosine kinase inhibitor combinations [28, 29], the dose of dasatinib was lower than the standard dose (100 mg/day to 70 mg b.i.d.) due to toxicity of the combination.

In this unselected patient population, the combination treatment was associated with a response rate of 15% and a disease control rate (partial response plus stable disease) of 59% at 6 weeks, similar to the response and control rates reported previously with this combination treatment [23]. All responses occurred in patients with *EGFR* mutations. The median progression-free survival (PFS) and overall survival (OS) times were 3.3 and 13 months, respectively; these survival durations are somewhat better than those reported in the literature for single-agent erlotinib in unselected groups of patients with NSCLC. In the BR.21 study, patients receiving second- or third-line erlotinib had a median PFS time of 2.2 months and a median OS time of 6.7 months [26]. In the TORCH trial, unselected patients with NSCLC who received front-line erlotinib had a median PFS time of 2.2 months and a median OS time of 8.7 months [30]. Our improved outcomes may be due to the small size of our study or to an additive effect of dasatinib. The observation that dasatinib did not reverse resistance to erlotinib, either alone or in combination with erlotinib, in *EGFR*-mutant NSCLC in a previous phase II study [31], and the absence of any responses in patients with wild-type *EGFR* in the current study supports the former conclusion that our favorable results may be related to small sample size and patient selection.

All 18 patients for whom pharmacokinetic analysis was conducted received the phase II doses. The pharmacokinetic parameters of erlotinib were calculated for the first dose (day -3) and at steady state (day 19), and parameters for dasatinib were calculated at steady state (day 19). Erlotinib's single-dose and steady-state parameters are similar to those seen in previous studies [23, 32-34]. As seen in previous studies [35], significant interpatient variability was observed for both erlotinib and dasatinib (Fig. 2). Erlotinib clearance was significantly lower at steady state than after single-dose administration ( $2.63 \pm 1.30$  and  $5.7 \pm 2.9$  L/hour,  $p = .0324$ ). Like Haura and colleagues [23], we found that concomitant administration of dasatinib did not alter erlotinib exposure in NSCLC patients. Interestingly, the steady-state dasatinib parameters seen in this study showed a longer half-life, lower clearance, and greater dose-adjusted exposure than those reported in previous studies [19, 36-38], supporting erlotinib-mediated inhibition of dasatinib clearance and potentially contributing to the need for dasatinib dose reduction [24] (Table 1).

Our study has several limitations. Our sample size was relatively small, with only 35 patients in the phase II portion. Many enrolled patients did not have sufficient tissue for biomarker analyses, limiting the power of these analyses. Still, although the biomarker studies showed no relationship between expression levels of E-cadherin or vimentin and patient outcomes, the epithelial-mesenchymal transition is a complex process that cannot be represented by only these two markers.

Our results do not support continued study of the combination of erlotinib and dasatinib in molecularly unselected NSCLC. Previous research has identified kinase-inactivating *BRAF* mutations and *DDR2* mutations as possible markers of dasatinib sensitivity in NSCLC [13, 39]. We did not test for these mutations because we saw no responses in *EGFR*-wild type patients. Erlotinib remains a standard and effective treatment for *EGFR*-mutant NSCLC or unselected NSCLC progressing on prior therapy [26, 40].

## References

1. Zhang J, Kalyankrishna S, Wislez M et al. SRC-family kinases are activated in non-small cell lung cancer and promote the survival of epidermal growth factor receptor-dependent cell lines. *Am J Pathol* 2007;170:366–376.
2. Song L, Morris M, Bagui T et al. Dasatinib (BMS-354825) selectively induces apoptosis in lung cancer cells dependent on epidermal growth factor receptor signaling for survival. *Cancer Res* 2006;66:5542–5548.
3. Byers LA, Sen B, Saigal B et al. Reciprocal regulation of c-Src and STAT3 in non-small cell lung cancer. *Clin Cancer Res* 2009;15:6852–6861.
4. Johnson FM, Saigal B, Talpaz M et al. Dasatinib (BMS-354825) tyrosine kinase inhibitor suppresses invasion and induces cell cycle arrest and apoptosis of head and neck squamous cell carcinoma and non-small cell lung cancer cells. *Clin Cancer Res* 2005;11:6924–6932.
5. Thomson S, Buck E, Petti F et al. Epithelial to mesenchymal transition is a determinant of sensitivity of non-small-cell lung carcinoma cell lines and xenografts to epidermal growth factor receptor inhibition. *Cancer Res* 2005;65:9455–9462.
6. Witta SE, Gemmill RM, Hirsch FR et al. Restoring E-cadherin expression increases sensitivity to epidermal growth factor receptor inhibitors in lung cancer cell lines. *Cancer Res* 2006;66:944–950.
7. Yauch RL, Januario T, Eberhard DA et al. Epithelial versus mesenchymal phenotype determines in vitro sensitivity and predicts clinical activity of erlotinib in lung cancer patients. *Clin Cancer Res* 2005;11:8686–8698.
8. Huang RY, Wong MK, Tan TZ et al. An EMT spectrum defines an anoikis-resistant and spheroidogenic intermediate mesenchymal state that is sensitive to E-cadherin restoration by a src-kinase inhibitor, saracatinib (AZD0530). *Cell Death Dis* 2013;4:e915.
9. Nagathihalli NS, Merchant NB. Src-mediated regulation of E-cadherin and EMT in pancreatic cancer. *Front Biosci (Landmark Ed)* 2012;17:2059–2069.
10. Chen YS, Wu MJ, Huang CY et al. CD133/Src axis mediates tumor initiating property and epithelial-mesenchymal transition of head and neck cancer. *PLoS One* 2011;6:e28053.
11. Johnson FM, Gallick GE. SRC family nonreceptor tyrosine kinases as molecular targets for cancer therapy. *Anticancer Agents Med Chem* 2007;7:651–659.
12. Johnson FM, Bekele BN, Feng L et al. Phase II study of dasatinib in patients with advanced non-small-cell lung cancer. *J Clin Oncol* 2010;28:4609–4615.
13. Sen B, Peng S, Tang X et al. Kinase-impaired BRAF mutations in lung cancer confer sensitivity to dasatinib. *Sci Transl Med* 2012;4:136ra70.
14. Tang X, Kadara H, Behrens C et al. Abnormalities of the TTF-1 lineage-specific oncogene in NSCLC: Implications in lung cancer pathogenesis and prognosis. *Clin Cancer Res* 2011;17:2434–2443.
15. Tang X, Varella-Garcia M, Xavier AC et al. Epidermal growth factor receptor abnormalities in the pathogenesis and progression of lung adenocarcinomas. *Cancer Prev Res (Phila)* 2008;1:192–200.
16. Tang X, Shigematsu H, Bekele BN et al. EGFR tyrosine kinase domain mutations are detected in histologically normal respiratory epithelium in lung cancer patients. *Cancer Res* 2005;65:7568–7572.
17. Johnson JR, Cohen M, Sridhara R et al. Approval summary for erlotinib for treatment of patients with locally advanced or metastatic non-small cell lung cancer after failure of at least one prior chemotherapy regimen. *Clin Cancer Res* 2005;11:6414–6421.
18. Brave M, Goodman V, Kaminskas E et al. Sprycel for chronic myeloid leukemia and Philadelphia chromosome-positive acute lymphoblastic leukemia resistant to or intolerant of imatinib mesylate. *Clin Cancer Res* 2008;14:352–359.
19. Johnson FM, Agrawal S, Burris H et al. Phase 1 pharmacokinetic and drug-interaction study of dasatinib in patients with advanced solid tumors. *Cancer* 2010;116:1582–1591.
20. Götze L, Hegele A, Metzelder SK et al. Development and clinical application of a LC-MS/MS method for simultaneous determination of various tyrosine kinase inhibitors in human plasma. *Clin Chim Acta* 2012;413:143–149.
21. De Francia S, D'Avolio A, De Martino F et al. New HPLC-MS method for the simultaneous quantification of the antileukemia drugs imatinib, dasatinib, and nilotinib in human plasma. *J Chromatogr B Analyt Technol Biomed Life Sci* 2009;877:1721–1726.
22. Roche S, McMahon G, Clynes M et al. Development of a high-performance liquid chromatographic-mass spectrometric method for the determination of cellular levels of the tyrosine kinase inhibitors lapatinib and dasatinib. *J Chromatogr B Analyt Technol Biomed Life Sci* 2009;877:3982–3990.
23. Haura EB, Tanvetyanon T, Chiappori A et al. Phase I/II study of the Src inhibitor dasatinib in combination with erlotinib in advanced non-small-cell lung cancer. *J Clin Oncol* 2010;28:1387–1394.
24. Reardon DA, Vredenburgh JJ, Desjardins A et al. Phase 1 trial of dasatinib plus erlotinib in adults with recurrent malignant glioma. *J Neurooncol* 2012;108:499–506.
25. Lynch TJ, Bell DW, Sordella R et al. Activating mutations in the epidermal growth factor receptor underlying responsiveness of non-small-cell lung cancer to gefitinib. *N Engl J Med* 2004;350:2129–2139.
26. Shepherd FA, Rodrigues Pereira J, Ciuleanu T et al. Erlotinib in previously treated non-small-cell lung cancer. *N Engl J Med* 2005;353:123–132.
27. Irby RB, Yeatman TJ. Role of Src expression and activation in human cancer. *Oncogene* 2000;19:5636–5642.
28. Toffalorio F, Spitaleri G, Catania C et al. Phase Ib of sorafenib in combination with everolimus in patients with advanced solid tumors, selected on the basis of molecular targets. *The Oncologist* 2014;19:344–345.
29. Hughes B, Mileskin L, Townley P et al. Pertuzumab and erlotinib in patients with relapsed non-small cell lung cancer: A phase II study using 18F-fluorodeoxyglucose positron emission tomography/computed tomography imaging. *The Oncologist* 2014;19:175–176.
30. Gridelli C, Ciardiello F, Gallo C et al. First-line erlotinib followed by second-line cisplatin-gemcitabine chemotherapy in advanced non-small-cell lung cancer: The TORCH randomized trial. *J Clin Oncol* 2012;30:3002–3011.

31. Johnson ML, Riely GJ, Rizvi NA et al. Phase II trial of dasatinib for patients with acquired resistance to treatment with the epidermal growth factor receptor tyrosine kinase inhibitors erlotinib or gefitinib. *J Thorac Oncol* 2011;6:1128–1131.
32. O’Byrant CL, Haluska P, Rosen L et al. An open-label study to describe pharmacokinetic parameters of erlotinib in patients with advanced solid tumors with adequate and moderately impaired hepatic function. *Cancer Chemother Pharmacol* 2012;69:605–612.
33. Frohna P, Lu J, Eppler S et al. Evaluation of the absolute oral bioavailability and bioequivalence of erlotinib, an inhibitor of the epidermal growth factor receptor tyrosine kinase, in a randomized, crossover study in healthy subjects. *J Clin Pharmacol* 2006;46:282–290.
34. Tran HT, Zinner RG, Blumenschein GR Jr et al. Pharmacokinetic study of the phase III, randomized, double-blind, multicenter trial (TRIBUTE) of paclitaxel and carboplatin combined with erlotinib or placebo in patients with advanced non-small cell lung cancer (NSCLC). *Invest New Drugs* 2011;29:499–505.
35. van Erp NP, Gelderblom H, Guchelaar HJ. Clinical pharmacokinetics of tyrosine kinase inhibitors. *Cancer Treat Rev* 2009;35:692–706.
36. Christopher LJ, Cui D, Wu C et al. Metabolism and disposition of dasatinib after oral administration to humans. *Drug Metab Dispos* 2008;36:1357–1364.
37. Demetri GD, Lo Russo P, MacPherson IR et al. Phase I dose-escalation and pharmacokinetic study of dasatinib in patients with advanced solid tumors. *Clin Cancer Res* 2009;15:6232–6240.
38. Araujo JC, Trudel GC, Saad F et al. Docetaxel and dasatinib or placebo in men with metastatic castration-resistant prostate cancer (ready): A randomised, double-blind phase 3 trial. *Lancet Oncol* 2013;14:1307–1316.
39. Hammerman PS, Sos ML, Ramos AH et al. Mutations in the DDR2 kinase gene identify a novel therapeutic target in squamous cell lung cancer. *Cancer Discov* 2011;1:78–89.
40. Rosell R, Carcereny E, Gervais R et al. Erlotinib versus standard chemotherapy as first-line treatment for European patients with advanced EGFR mutation-positive non-small-cell lung cancer (EURTAC): A multicentre, open-label, randomised phase 3 trial. *Lancet Oncol* 2012;13:239–246.

## Figures and Tables

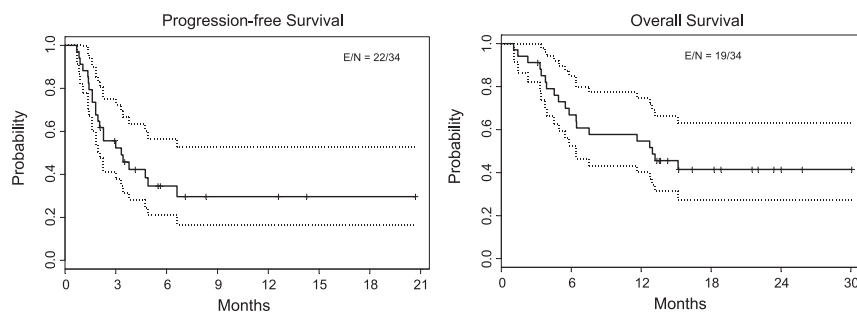

**Figure 1.** Kaplan Meier Curves showing progression-free and overall survival durations for 34 evaluable patients in the phase II study. Abbreviations: E, events (i.e., progression or death); N, total number of patients.

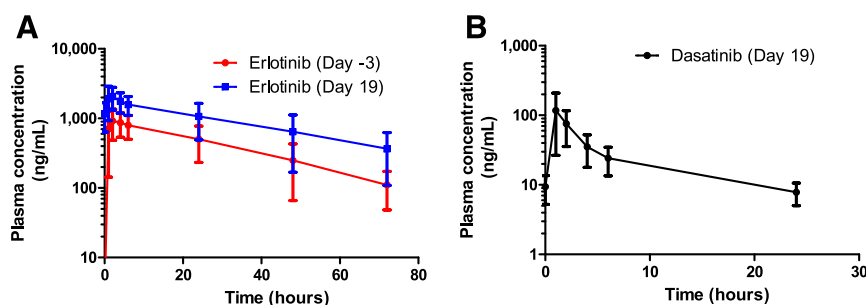

**Figure 2.** Mean ( $\pm$  SD) plasma concentrations of erlotinib and dasatinib over time.

**Table 1.** Pharmacokinetics of dasatinib and erlotinib

| Parameter                                         | Treatment day, cycle 1       |                               |                               |
|---------------------------------------------------|------------------------------|-------------------------------|-------------------------------|
|                                                   | Erlotinib day -3<br>(n = 18) | Erlotinib day +19<br>(n = 11) | Dasatinib day +19<br>(n = 14) |
| Dose-adjusted AUC ( $h \times \mu\text{g/L/mg}$ ) | 235.8 $\pm$ 177.8            | 544.74 $\pm$ 289.9            | 8.6 $\pm$ 3.0                 |
| AUC <sub>0-∞</sub> ( $h \times \mu\text{g/L}$ )   | 35,369.1 $\pm$ 26,674.3      | 81,710.3 $\pm$ 43,490.6       | 602.1 $\pm$ 253.1             |
| AUC <sub>0-24</sub> ( $h \times \mu\text{g/L}$ )  | 15,951.5 $\pm$ 6,134.2       | 33,977.5 $\pm$ 12,649.3       | 531.7 $\pm$ 234.8             |
| Clearance (L/h)                                   | 5.7 $\pm$ 2.9                | 2.4 $\pm$ 1.3                 | 143.1 $\pm$ 73.0              |
| C <sub>max</sub> (ng/mL)                          | 1,803.4 $\pm$ 414.3          | 2,144.4 $\pm$ 761.6           | 123.5 $\pm$ 84.8              |
| Terminal plasma half-life (h)                     | 24.5 $\pm$ 14.6              | 27.7 $\pm$ 10.6               | 7.5 $\pm$ 4.2                 |
| Ke (L/h)                                          | 0.04 $\pm$ 0.02              | 0.03 $\pm$ 0.02               | 0.1 $\pm$ 0.1                 |
| T <sub>max</sub> (h)                              | 2.9 $\pm$ 1.4                | 2.1 $\pm$ 1                   | 1.3 $\pm$ 0.5                 |
| V (L)                                             | 168.1 $\pm$ 70               | 80.1 $\pm$ 29                 | 1,434.7 $\pm$ 847.4           |

Data are shown as mean  $\pm$  SD. For patients participating in pharmacokinetic studies, a single dose of erlotinib was given 3 days before treatment with combination therapy. Blood samples for pharmacokinetic analysis were collected on the first day of erlotinib administration (day -3, cycle 1) and on day 19 (cycle 1) of erlotinib and dasatinib administration at 0, 1, 2, 4, 6, 8, 24, 48, and 72 hours after administration.

Abbreviations: AUC, area under the curve representing plasma concentration over time; AUC<sub>0-∞</sub>, area under the curve representing plasma concentration from 0 hours to infinity; AUC<sub>0-24</sub>, area under the curve representing plasma concentration from 0 to 24 hours; C<sub>max</sub>, maximum observed plasma concentration; h, hours; Ke, elimination constant; T<sub>max</sub>, time to reach maximum plasma concentration; V, volume of distribution.

[Click here](#) to access other published clinical trials.
